# Supplementary material for: Impact of COVID-19 on the Health of the General and More Vulnerable Population and Its Determinants: Health Care and Social Survey–ESSOC, Study Protocol
Source: Int J Environ Res Public Health. 2021 Jul 31;18(15):8120. doi: 10.3390/ijerph18158120 (PMC8345631; doi:10.3390/ijerph18158120)
Supplement: Supplementary file 1 [file ijerph-18-08120-s001.zip]

Archive with 5 entries (5 files):
- SupplementaryMaterial1_DataManagementPlanEnglish.pdf
- SupplementaryMaterial2_QuestionnairesEnglish.pdf
- SupplementaryMaterial2_QuestionnairesSpanish.pdf
- SupplementaryMaterial3_AuxiliaryVariablesEnglish.pdf
- SupplementaryMaterial3_AuxiliaryVariablesSpanish.pdf
